# Supplementary material
Source: PubMed Central journal article supplement (PMC8623355)
Supplement: NIHMS1747234-supplement-1.pdf [file NIHMS1747234-supplement-1.pdf]

**Supplemental Information**

**Figure S1. Histopathology reveals extensive tissue architectural restoration during ear regeneration in *Acomys* versus fibrotic scarring in *Mus*, related to Figure 1.**

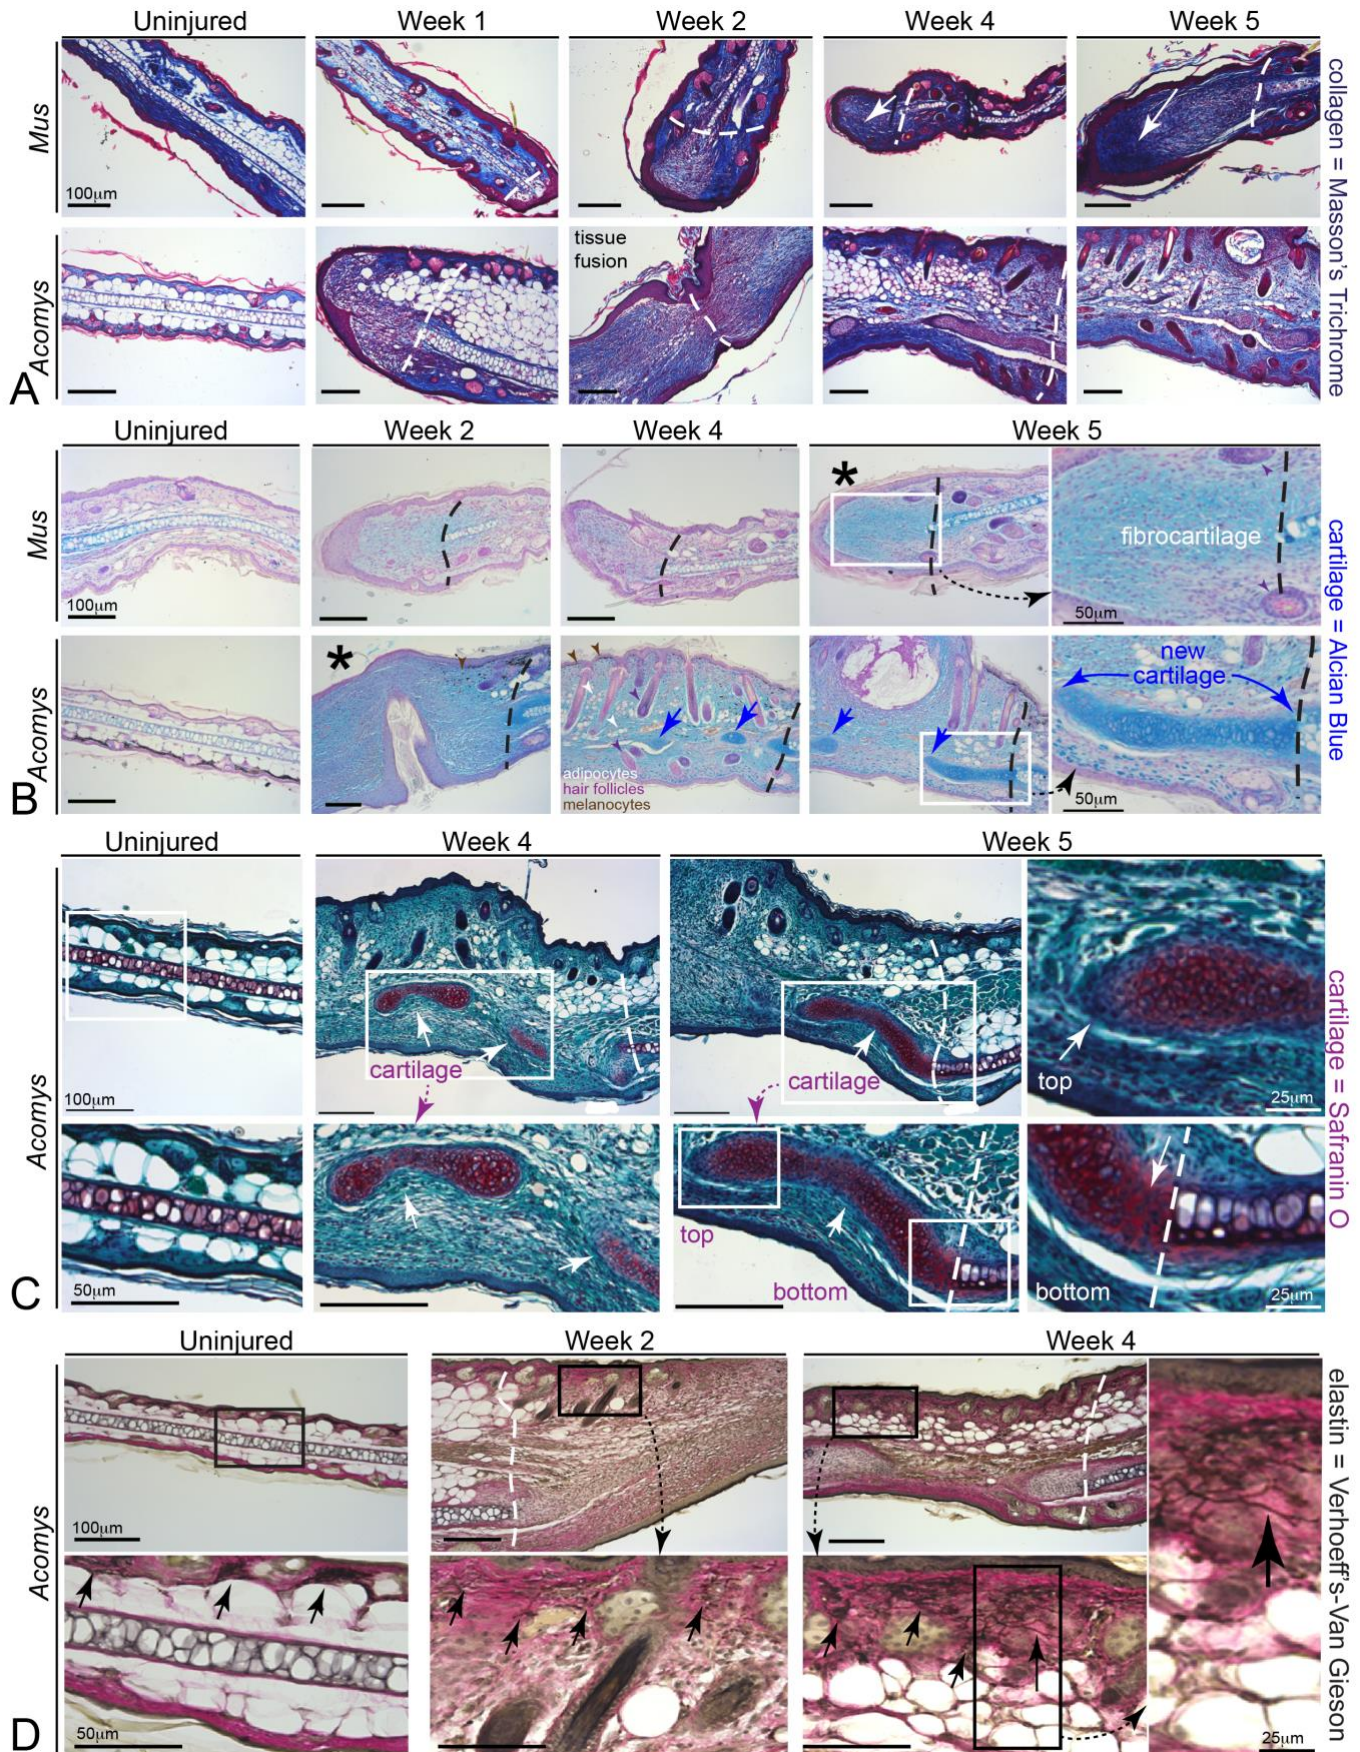

**(A)** Paraffin sections from *Mus* and *Acomys* timed ear wound series were stained with Masson's Trichrome to reveal mature cross-linked collagen (dark blue). Note *Mus* normally has higher overall levels compared to *Acomys*, forming a distinct and permanent collagen network in the healed subdermal scar (arrows), by contrast to *Acomys* that maintains lower levels at all stages during regenerative healing.

**(B, C)** Similar comparative healing series stained with Alcian Blue **(B)** or Safranin O **(C)** revealed extensive outgrowth of new cartilage from the pre-existing plate and *de novo* formation of cartilage islands within the regenerating tissue by week 4 that continued to mature and structurally organize by week 5: note extensive *de novo* adipocyte formation/differentiation, hair follicle neogenesis, and appearance of new migrating subdermal melanocytes were readily apparent by week 4-5 in *Acomys*. Note also that *Mus* wounds heal/scar with diffuse unstructured fibrocartilage in the subdermal blastema region associated with dense cross-linked collagen (A) without adipocytogenesis or hair follicle neogenesis.

**(D)** *Acomys* adult regeneration includes the re-establishment of long elastin fibers (Verhoeff's-Van Gieson counterstain, brown, arrows) to new tissue architecture near the subdermal region, a process restricted to fetal skin repair in humans (Le Page et al., 2019).

**Figure S2. *Acomys* retains *in vivo* regenerative capacity across age and sex, and TGFβ1 signaling induces non-conserved ECM induction in MFs *in vitro*, related to Figure 1.**

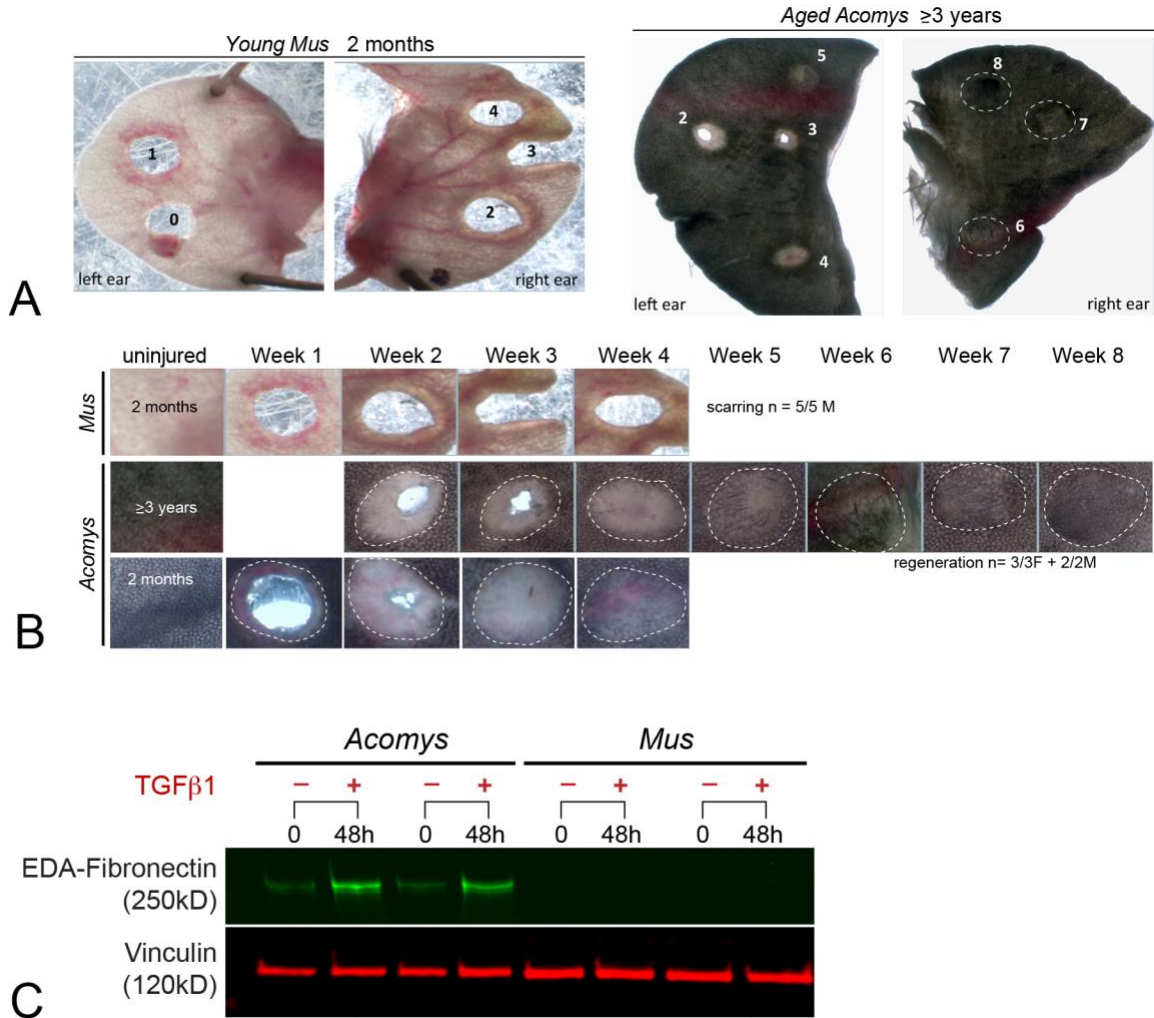

**(A)** Low-power views of whole ear punch timed injury/healing series between young CD1 *Mus* (2 months, left) compared to aged *Acomys* (≥3 years, right).

**(B)** Higher-power views reveal that aged *Acomys* animals from both sexes retain the ability to regenerate multiple 2mm ear punch injuries, including re-pigmentation and hair follicle neogenesis, by contrast to *Mus*: note that regeneration in aged animals may be slightly delayed (~1 week) with respect to young animals (bottom reference panel from **Figure 1A**) but still regenerate.

**(C)** Western blotting revealed *Acomys* primary ear fibroblasts normally express low levels of EDA-F under control culture conditions that was strongly upregulated after 48h TGFβ1 treatment, by contrast to *Mus*, indicating operational MF formation *in vitro* as well as *in vivo* (**Figure 1D**) despite non-conserved *Acta2* response: independent cultures.

Figure S3. Image analysis pipeline quantification, related to Figure 2 and Figure 5.

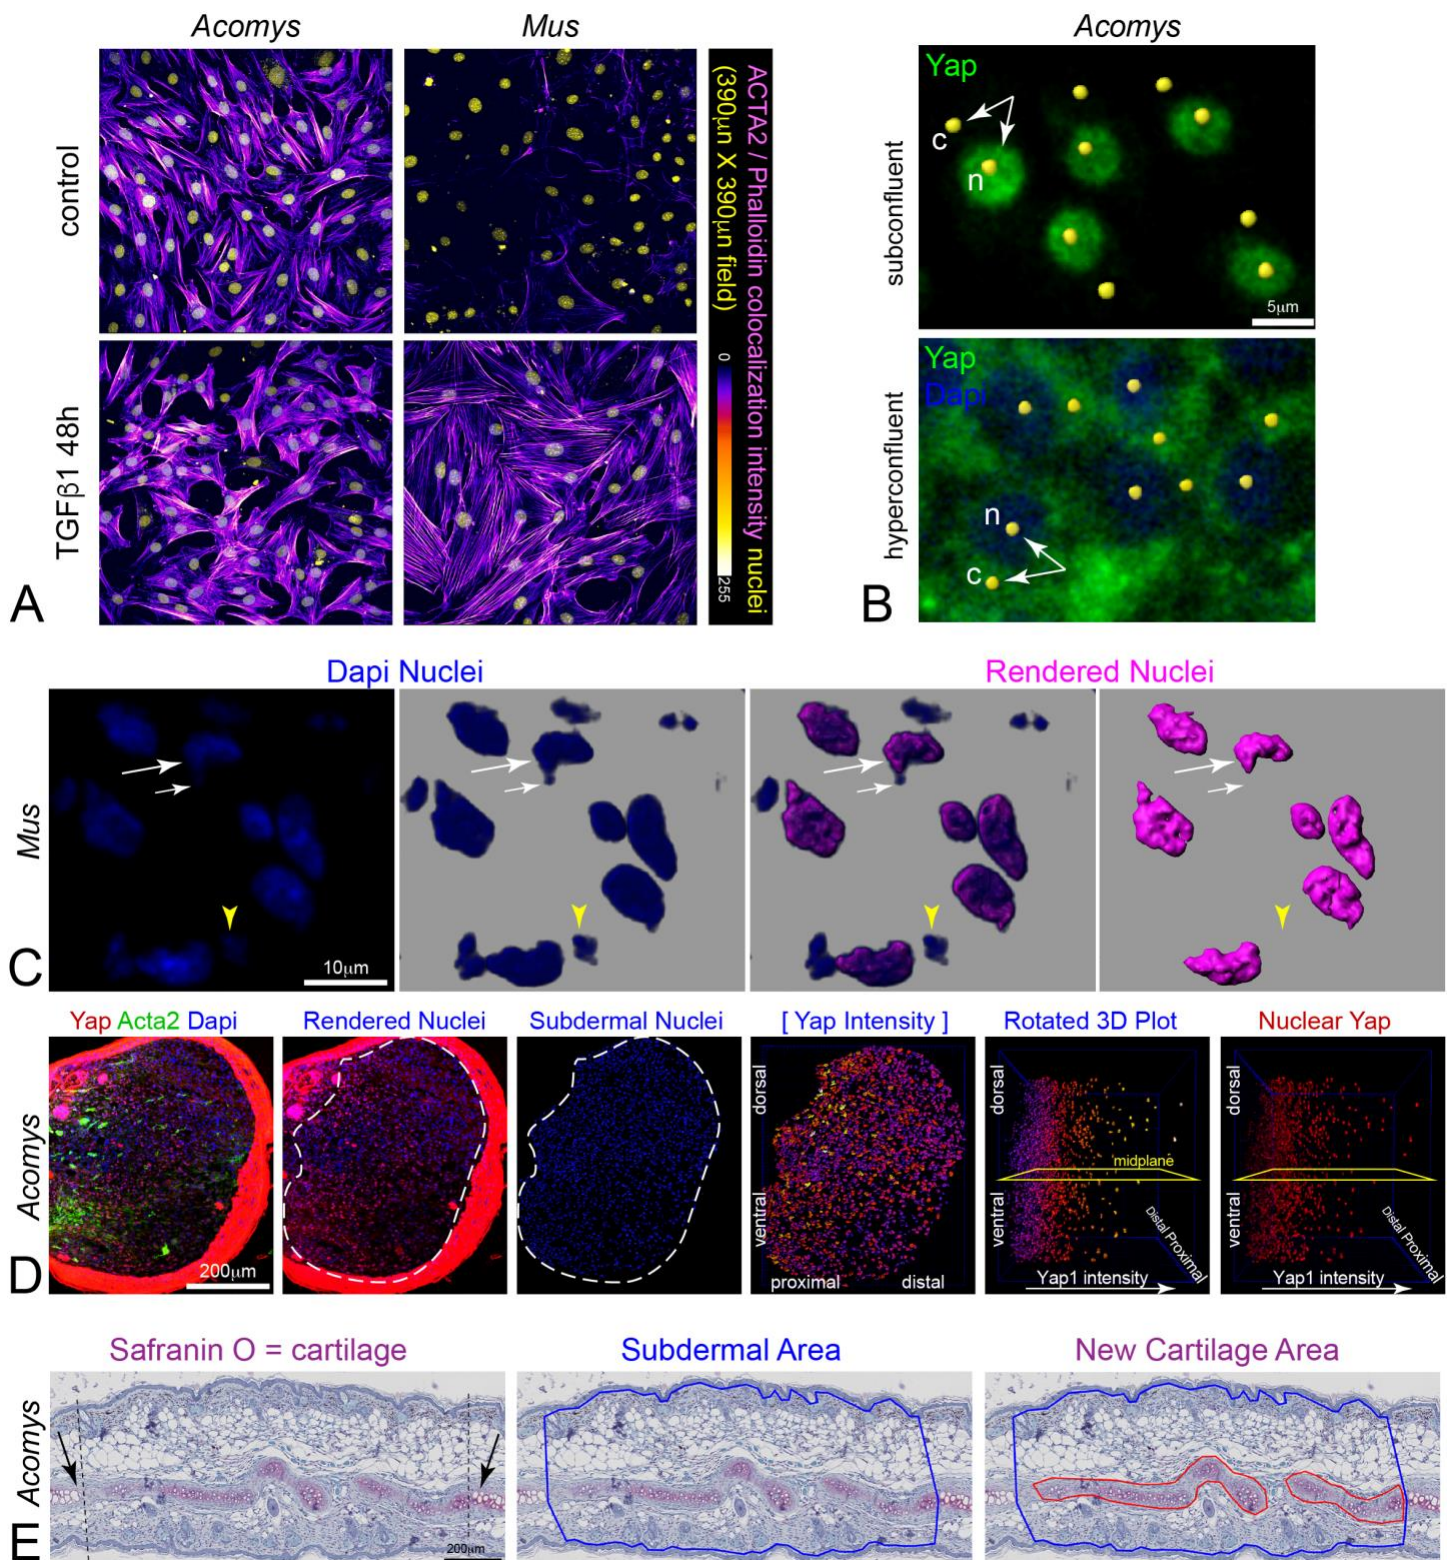

(A) Example of *in vitro* Acta2/Phalloidin confocal colocalization channel quantification levels per cell/nuclei field of view.

(B) Example of *in vitro* Yap cytoplasmic/nuclear ratios determined by paired 300nm diameter spot analysis of relative Yap intensities (Imaris), with Dapi defined nuclei in 2D images.

- (C) Example of *in vivo* Yap cytoplasmic/nuclear ratios determined in 3D confocal volumes using Dapi to conservatively render, segment, and filter nuclei.
- (D) Example of image quantification pipeline for isolating subdermal nuclei, viewing nuclear Yap intensity levels in rotated 3D views to better view dorsal ventral pattern differences.
- (E) Regenerated cartilage area was determined by quantifying the Safranin O stained new cartilage area within the identified subdermal injury zone.

**Figure S4. TGFβ1 induces myofibroblast differentiation in human fibroblast lines, related to Figure 2.**

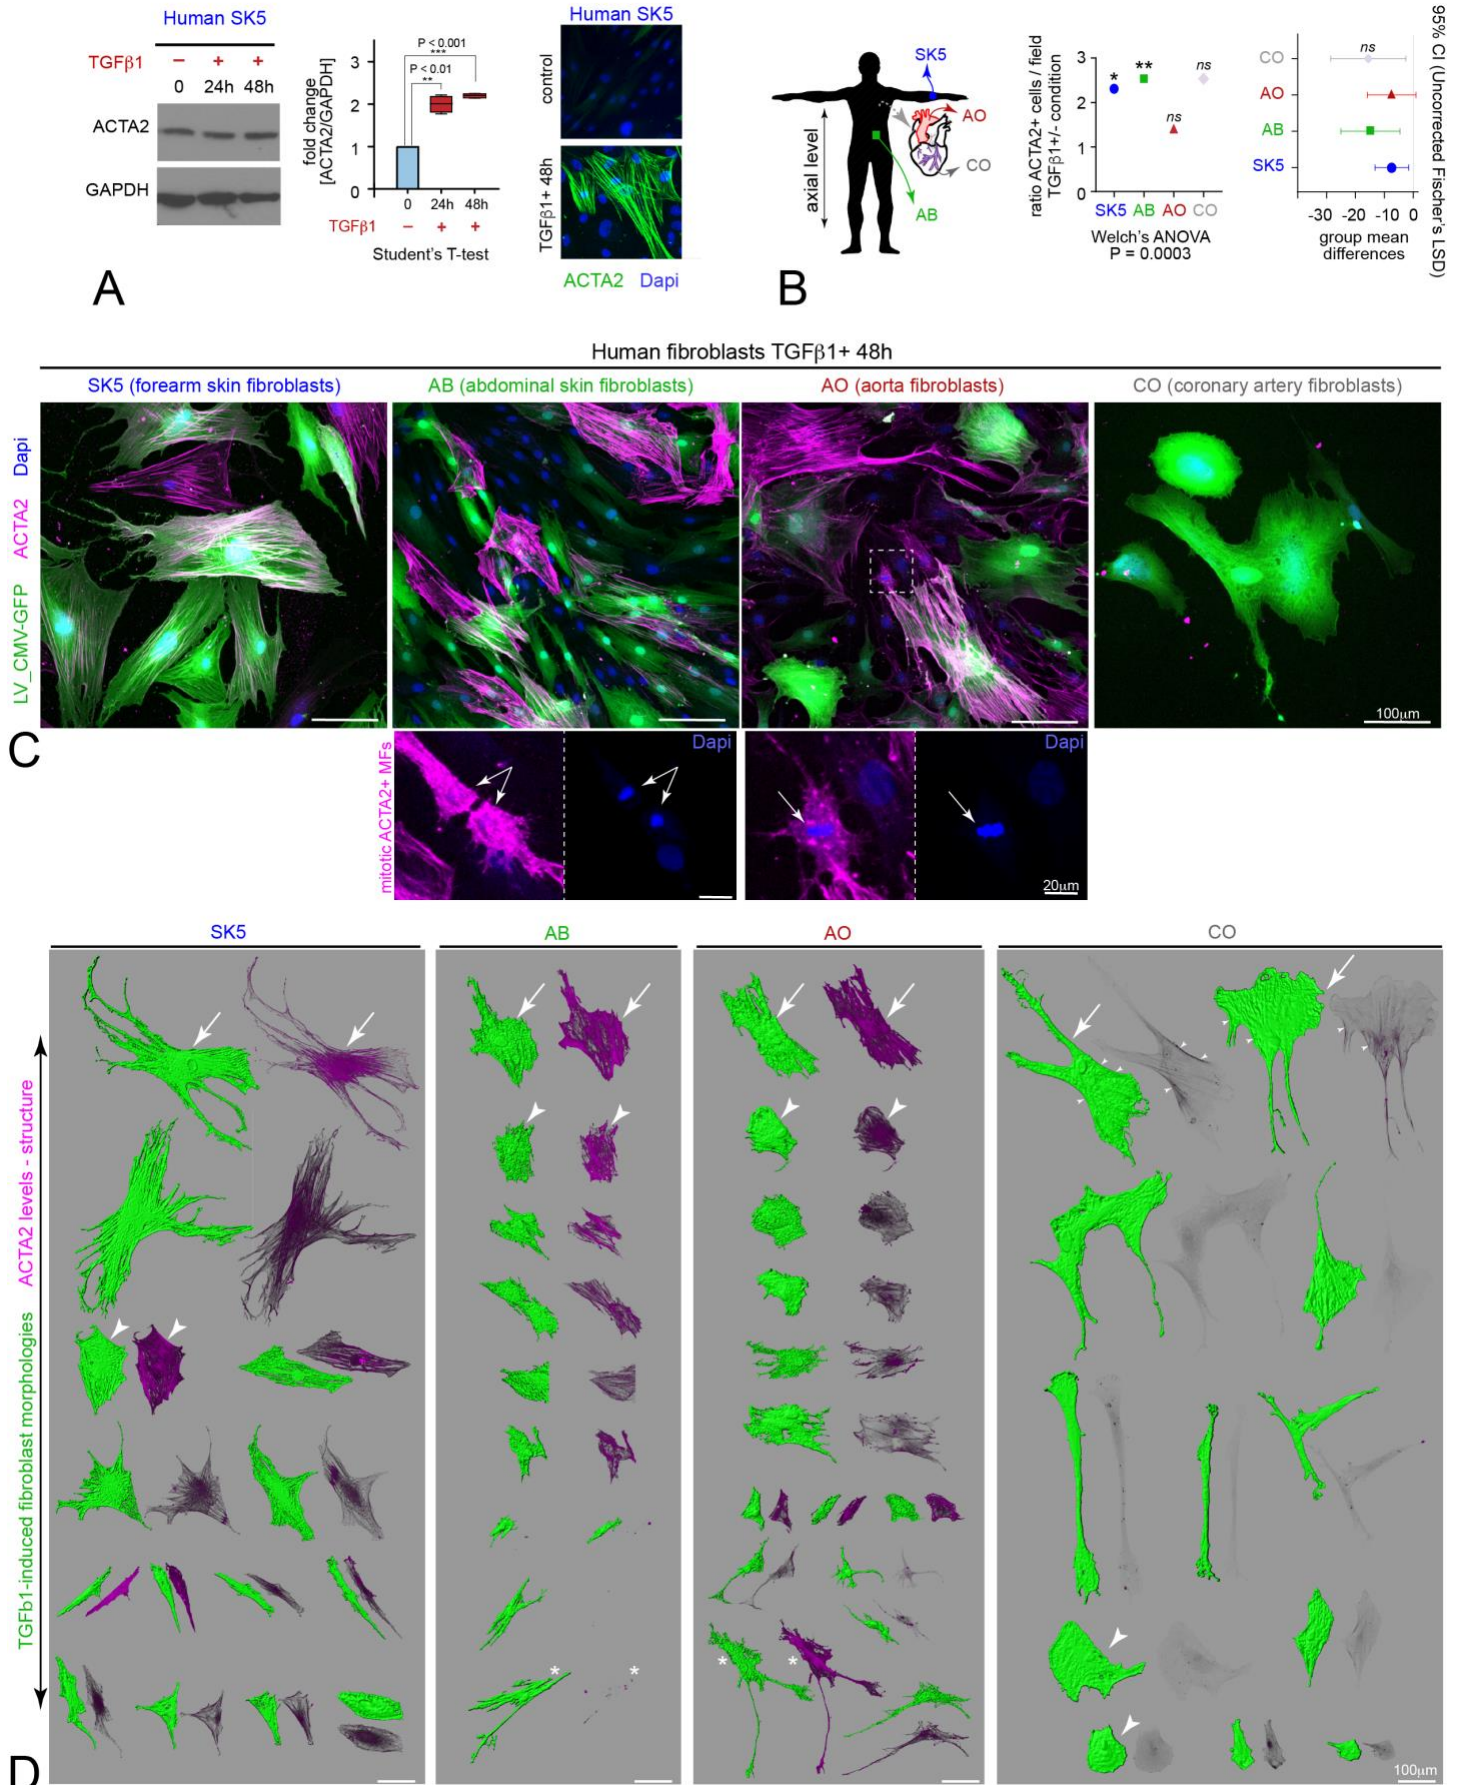

**(A)** Western blot, quantification, and immunofluorescence of human SK5 dermal fibroblasts treated with TGF $\beta$ 1 compared to controls revealed increased ACTA2 expression and stress fiber formation; data are mean  $\pm$  SD.

**(B)** Quantification of TGF $\beta$ 1-mediated ACTA2 immunofluorescence response in additional human fibroblast cell lines from different axial levels and origins: primary abdominal (AB) fibroblasts, aorta (AO) and coronary (CO) vessel fibroblasts: data are  $\pm$  SD, statistics as indicated, \* P<0.01, \*\* P<0.001, n.s. and # not significant.

**(C)** Visualization of ACTA2 (magenta) labeling in human TGF $\beta$ 1-induced MFs in vitro, some of which were transduced with constitutively expressed control GFP lentivirus 2 days prior in order to better visualize complete MF morphologies: note that AB and AO lines were still proliferative after 48h TGF $\beta$ 1 exposure.

**(D)** Examples of the range of ACTA2 levels and structural organization induced after 48h TGF $\beta$ 1 exposure; note that large flattened MFs are consistent morphological features in some cells (arrows and arrowheads).

**Figure S5. Bioinformatic amino acid sequence of *Acomys* indicates Yap protein is highly conserved in mammals, related to Figure 4.**

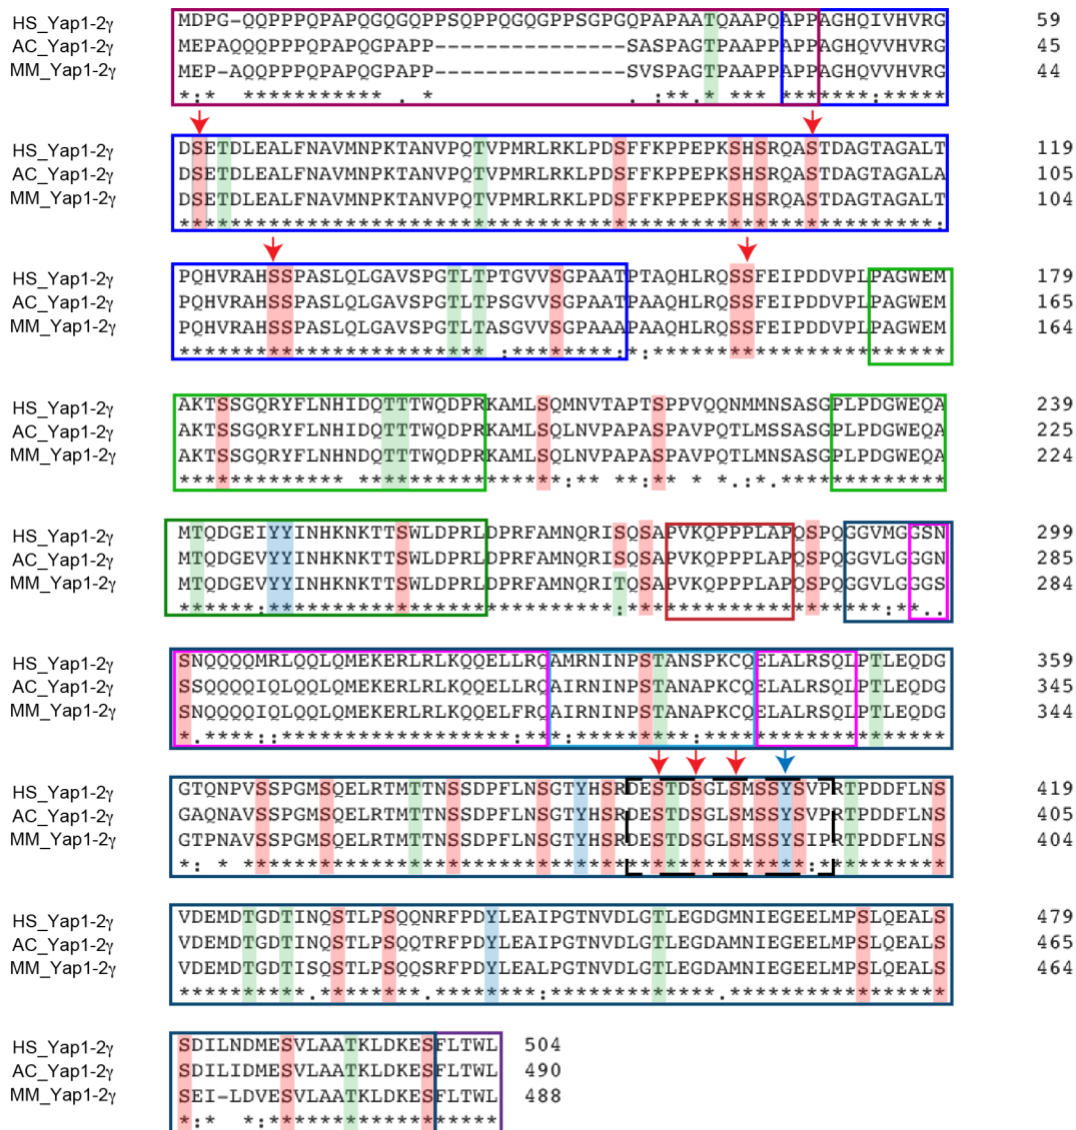

**A**

Percent Identity

| %  | HS  | AC  | MM  |
|----|-----|-----|-----|
| HS | 100 |     |     |
| AC | 93  | 100 |     |
| MM | 91  | 96  | 100 |

**B**

NetPhos 3.1 PO4 prediction

|                    | Acomys | Mus | Human | Conserved |
|--------------------|--------|-----|-------|-----------|
| <b>S</b> Serine    | 38     | 39  | 42    | <b>37</b> |
| <b>T</b> Threonine | 19     | 19  | 19    | <b>17</b> |
| <b>Y</b> Tyrosine  | 5      | 5   | 5     | <b>5</b>  |

**C**

(score >0.5, scale 0-1)

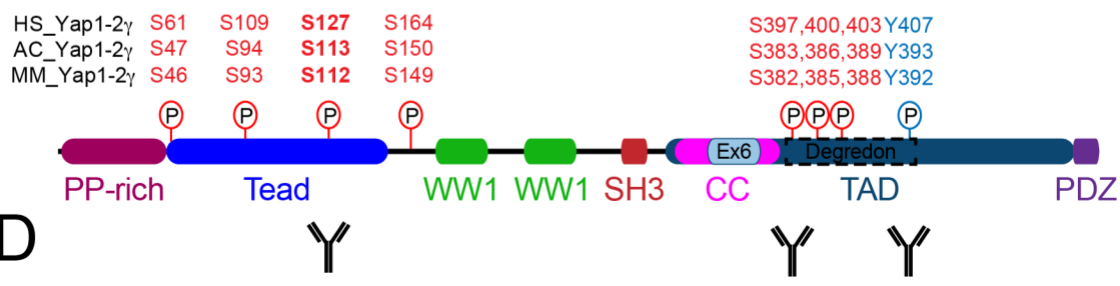



**(A)** *Acomys* predicted full-length Yap1 peptide and domain sequence were extracted from our *Acomys cahirinus* Genome (separate publication in prep), and multiply aligned to *Mus* (MM) and human (HS) Yap 1-2γ isoforms using Clustal Omega ([www.ebi.ac.uk/Tools/msa/clustalo/](http://www.ebi.ac.uk/Tools/msa/clustalo/)), and conserved phosphorylation sites predicted using NetPhos 3.1 (<http://www.cbs.dtu.dk/services/NetPhos/>) (red arrows indicate Serine phosphorylation sites while blue indicates Tyrosine).

**(B)** Comparison of percent amino acid sequence identity between *A. cahirinus* (AC), *M. musculus* (MM), and human (HS) Yap 1-2 protein.

**(C)** All key conserved sites in human and mouse Yap1 are predicted phosphorylation sites within *Acomys*.

**(D)** Schematic of *Acomys* Yap protein domains compared to known *Mus* and human protein domains, with species-specific AA nomenclature. Antibody cartoons indicate the targeted phosphorylation sites utilized in this study.

**Figure S6. Accelerated Yap dephosphorylation kinetics is mediated by a PP2A-class serine/threonine phosphatase in *Acomys* primary ear fibroblasts, related to Figure 4.**

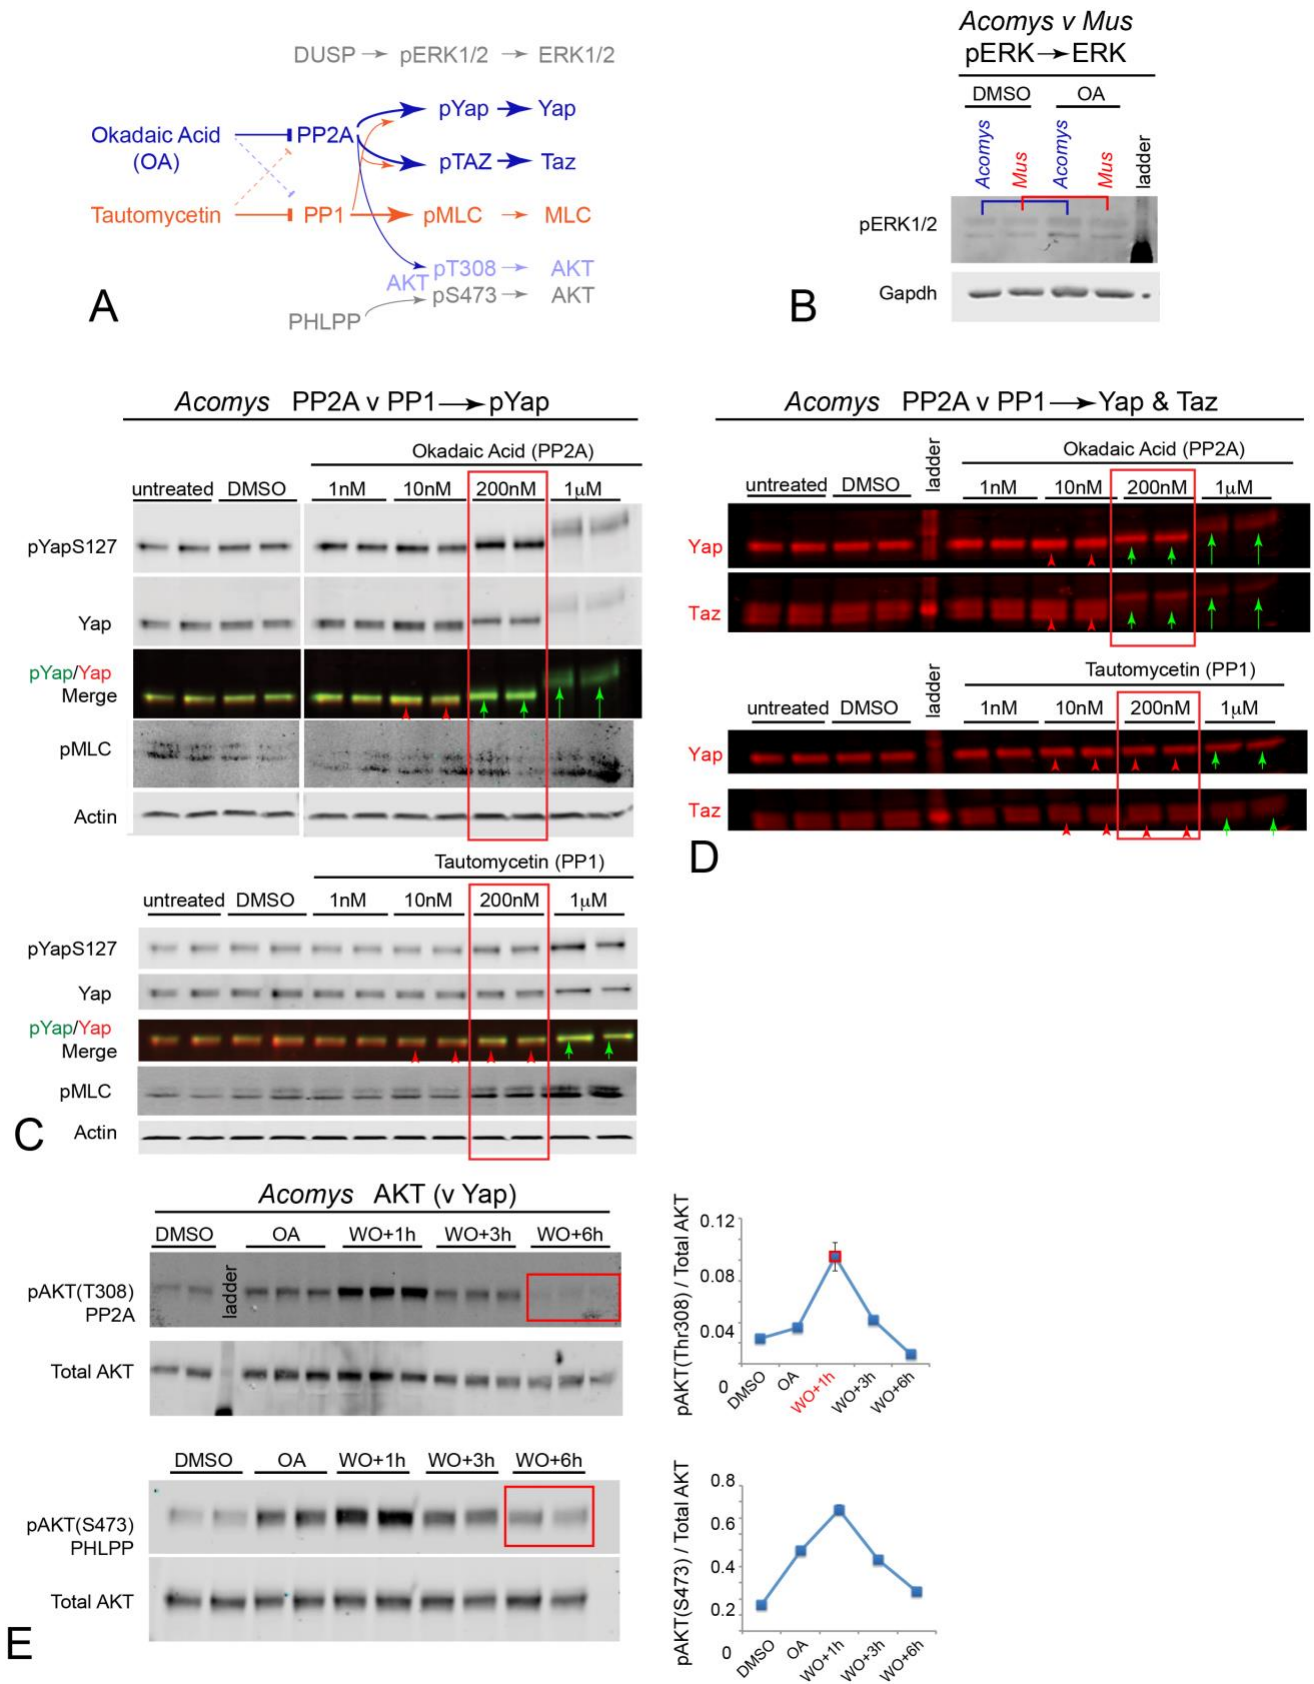

(A) Phosphatase substrates and inhibitors used to control for PP2A-mediated rapid Yap dephosphorylation kinetics.

(B) Western blots for ERK phosphorylation in *Acomys* versus *Mus* fibroblasts during okadaic acid (OA) pulse show equally low levels of pERK consistent with it being a general DUSP phosphatase substrate (not PP1-PP2A) in both species.

(C) Western blots for phosphorylation status of Yap-S127 (pYapS127) and myosin light chain S20 (pMLC) in response to various concentrations of OA, a PP2A-selective inhibitor, compared to tautomycin, a PP1-selective inhibitor, in *Acomys* dermal fibroblasts (replicate cultures). Selective increases in pYap-S127/total Yap with no change in pMLC levels in the presence of 200nM OA are consistent with a PP2A-class S/T phosphatase activity. Selective increases in pMLC levels with only minor changes in pYap-S127/total Yap at 200nM tautomycin argue against a major contribution of a PP1-class protein phosphatase activity for pYapS127 in *Acomys*.

(D) Independent Western blots confirms bot Yap and Taz are both high-affintiy PP2A substrates compared to PP1, visualized as gel shifts due to increased phosphorylation levels and molecular weights (replicate cultures).

(E) Western blots and quantification of phosphorylation status of AKT(T308), a PP2A-dependent substrate (triplicate cultures), compared to AKT(S473), a Phlpp-dependent substrate (replicate cultures), confirms high PP2A phosphatase activity in *Acomys* fibroblasts: note increased levels of P-T308 at 1h after general WO stress-mediated increase, by contrast to Yap (**Figure 4C,D**), followed by rapid dephosphorylation compared to P-S473 kinetics: data are mean  $\pm$  SD.

**Figure S7. Comparative *in vivo* YAP signaling patterns and output between *Mus* fibrosis versus *Acomys* regeneration, related to Figure 5 and Figure 6.**

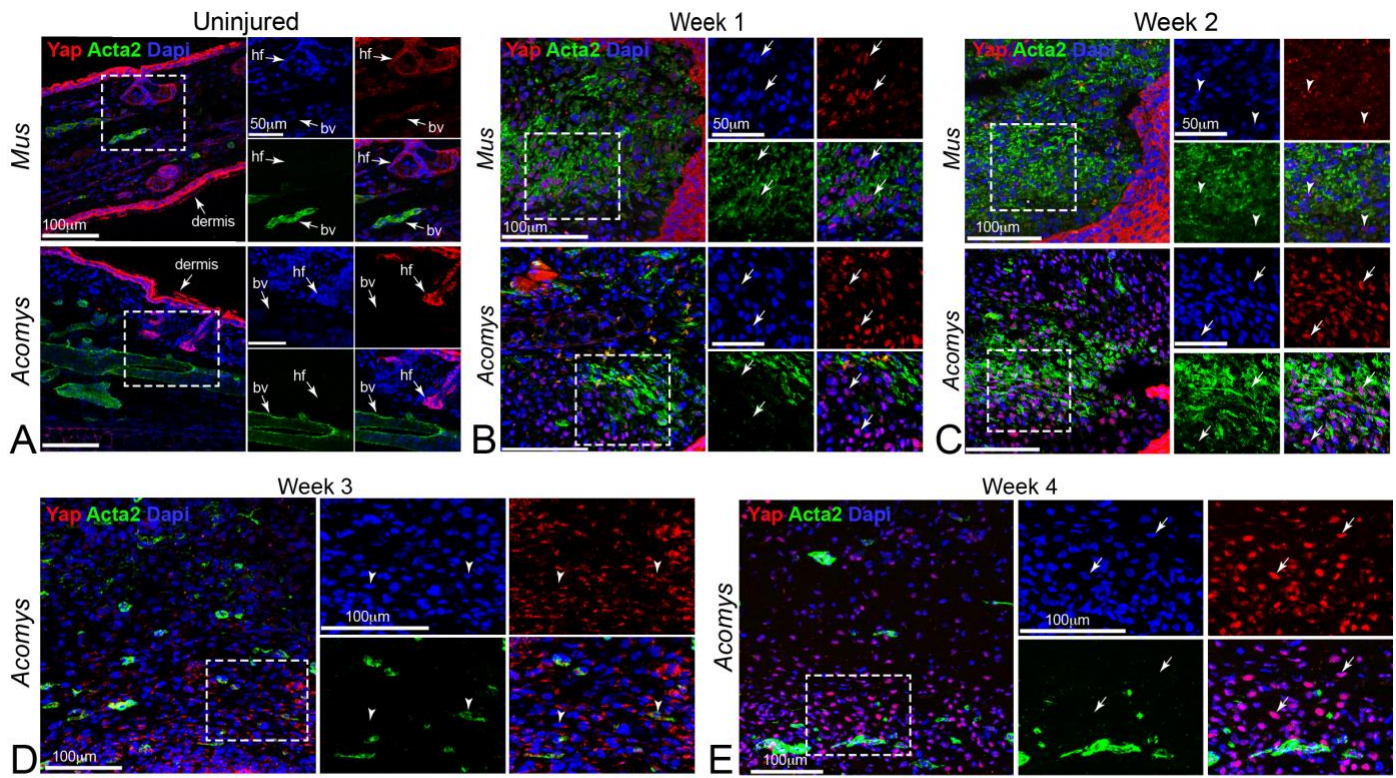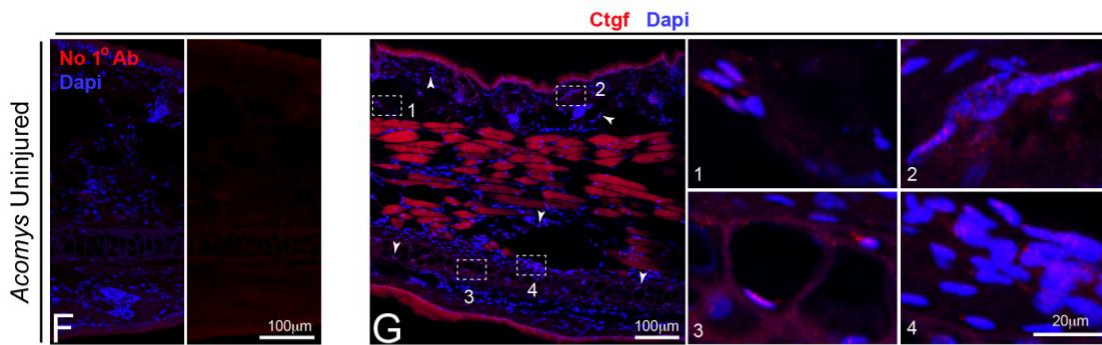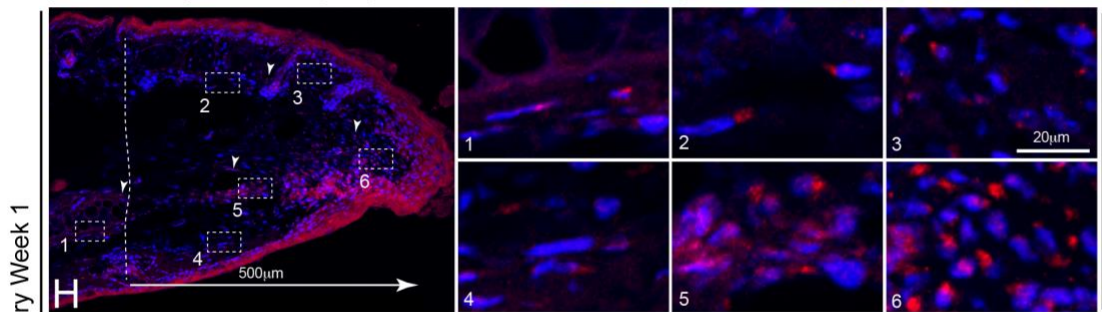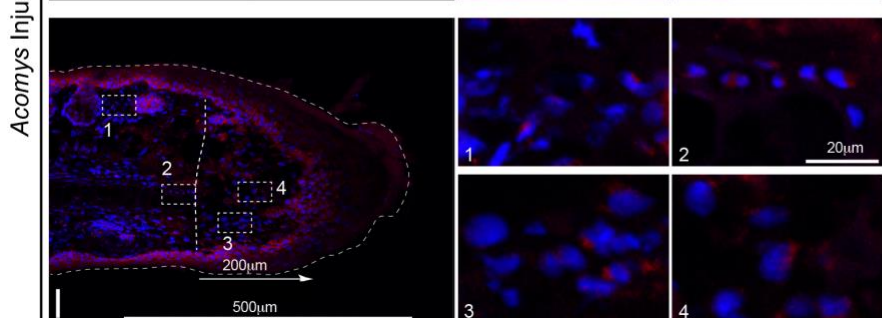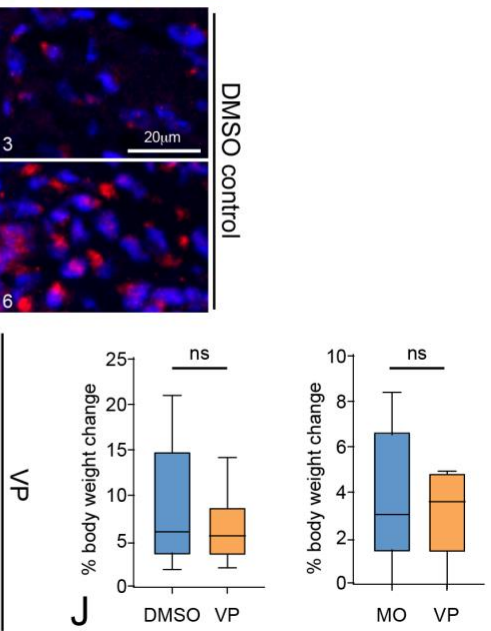

**(A)** Immunostaining for YAP and Acta2 localization in uninjured *Acomys* and *Mus* at indicated time points indicates diffuse Yap cytoplasmic labeling in dermal and subdermal structures with Acta2 localized to BVs (arrows): merged and single-channels. Dashed white boxes indicate areas of higher magnification. Arrows indicate Yap nuclear localization. Arrowheads indicate Yap cytoplasmic localization. BV = blood vessel, HF=hair follicle.

**(B, C)** YAP and Acta2 immunostaining at week 1 (B) and week (2) reveal decreasing perinuclear cytoplasmic Yap localization and levels in Acta2<sup>+</sup> cells in *Mus* (arrowheads, top panels), by contrast to *Acomys* that exhibit higher nuclear Yap levels (arrows, bottom panels): merged and single-channels.

**(D,E)** *Acomys* Yap labeling re-organizes to the cytoplasm (OFF) at week 3 as tissue closes (**D**), and then switches back to predominately nuclear localization (ON) in many Acta2<sup>-</sup> cells by week 4, as further patterning and differentiation events continue (**E**), especially in ventral regions.

**(F-J)** *In vivo* validation of the Yap-Tead target Ctgf protein expression, localization, and attenuation due to VP-treatment during *Acomys* regeneration.

**(F)** Uninjured no primary antibody control section imaged at equivalent conditions as sections incubated with anti-Ctgf antibody

**(G-I)** indicates diffuse cytoplasmic labeling in the dermis, and perinuclear labeling in discrete subsets of cells located in the subdermal region, near hair follicles, overlying and within the cartilage plate (**G**, arrowheads and higher power numbered side panels), as well as skeletal muscle fibers, consistent with known sources in *Mus* (Kapoor et al., 2008; Morales et al., 2018).

**(H)** By 1 week of regeneration in *Acomys*, Ctgf expression appears increased in cells in the subdermal blastema and especially near the cartilage plate break, which appear to form a stream migrating outwards into the re-growing tissue underneath the epidermal cap (arrowheads and higher power numbered side panels). **(I)** VP-treatment according to the schedule depicted in **Figure 6A** reveals attenuated outgrowth of new tissue, and decreased Ctgf labeling in cells located in the subdermal region (arrowheads and higher power numbered side panels).

**(J)** Chronic VP-treatment was not overtly toxic: weight change quantification of acute (2 weeks) and chronic (5 weeks) VP (blue) treatment compared to DMSO or MO control (orange): N =  $\geq 4$  each group; data are mean  $\pm$  SD.

**Supplementary Table S1: Top 15 most significantly TGFβ1-induced transcriptional changes in *Acomys* DFs *in vitro*, related to Figure 2.** Top 15 most significantly TGFβ1-induced transcriptional changes in *Acomys* DFs *in vitro*, related to Figure 2 and Supplemental table S2. RNAseq was used to analyze transcriptional responses in *Acomys* primary fibroblasts exposed to low-serum +/- TGFβ1 for 24h (bulk cells, N=3 wells per condition).

| <u>Gene (homolog)</u>                                      | <u>logFC</u>       | <u>logCPM</u>          | <u>PValue adj</u> | <u>FDR</u>           |
|------------------------------------------------------------|--------------------|------------------------|-------------------|----------------------|
| <b><i>Pai1</i></b>                                         | <b>2.647291702</b> | <b>5.865759098</b>     | <b>2.21E-50</b>   | <b>2.68E-46</b>      |
| <i>Prg4</i>                                                | 2.349346462        | 4.221240254            | 3.22E-47          | 1.95E-43             |
| <i>Sned1</i>                                               | -3.572702583       | 8.68098451             | 7.92E-47          | 3.21E-43             |
| <i>E9Q7P6</i>                                              | 2.525836415        | 6.824202481            | 2.10E-46          | 6.38E-43             |
| <i>E9QMD2</i>                                              | 2.989355171        | 9.308402796            | 2.63E-31          | 6.38E-28             |
| <i>Tena</i>                                                | 2.156944645        | 7.137936784            | 1.22E-28          | 2.47E-25             |
| <i>Atl2</i>                                                | 4.450574249        | 10.63043427            | 3.12E-27          | 5.41E-24             |
| <i>Red1</i>                                                | 2.552123202        | 8.523207572            | 1.36E-26          | 2.07E-23             |
| <i>Pthd3</i>                                               | -4.079641324       | 10.58192553            | 6.41E-26          | 8.65E-23             |
| <i>Pgh2</i>                                                | 2.245182058        | 8.464638508            | 1.91E-25          | 2.32E-22             |
| <b><i>Ctgf</i></b>                                         | <b>1.852407673</b> | <b>4.133517831</b>     | <b>4.40E-23</b>   | <b>4.85E-20</b>      |
| <i>CP26A</i>                                               | 3.113353436        | 0.818352124            | 5.77E-23          | 5.84E-20             |
| <i>unknown1853</i>                                         | -1.469084857       | 5.132738894            | 1.70E-22          | 1.59E-19             |
| <i>Oasl2</i>                                               | -2.549325574       | 8.593545338            | 1.88E-22          | 1.63E-19             |
| <i>Red = TGFβ1 target</i><br><i>Blue = Yap-Tead target</i> | FC Fold Change     | CPM Counts per Million | Adjusted P value  | False Discovery Rate |
